# Supplementary material for: Ex Vivo Optimization of Donor Lungs with Inhaled Sevoflurane during Normothermic Ex Vivo Lung Perfusion (VITALISE): A Pilot and Feasibility Study in Sheep
Source: MDPI journal article supplement (doi:10.3390/ijms25042413), 2024-02-19
Supplement: s1 [file s1]

Ex Vivo optimisation of donor Lungs with Inhaled Sevoflurane during normothermic ex vivo lung perfusion (VITALISE): A pilot and feasibility study in sheep.

Timo Steinkühler, BSc; Shuqi Yang, MD; Michiel A. Hu, MD; Jayant S. Jainandunsing, MD; Dr. Neeltina M. Jager, MD PhD; Dr. Michiel E. Erasmus, MD PhD; Prof. Dr. Michel M. R. F. Struys, MD PhD, FRCA; Dr. Dirk J. Bosch, MD PhD; Dr. Matijs van Meurs, MD PhD; Prof. Dr. Matthieu Jabaudon, MD PhD; Dr. Damien Richard, PharmD PhD; Prof. Dr. Wim Timens, MD PhD; Prof. Henri G. D. Leuvenink, MSc PhD; Dr. Gertrude J. Nieuwenhuijs-Moeke, MD PhD

## Supplementary Material

### Table of Contents

|                                           |          |
|-------------------------------------------|----------|
| <b><i>Supplementary Figures</i></b> ..... | <b>2</b> |
| <b><i>Supplementary Tables</i></b> .....  | <b>4</b> |
| <b><i>References</i></b> .....            | <b>6</b> |

## Supplementary Figures

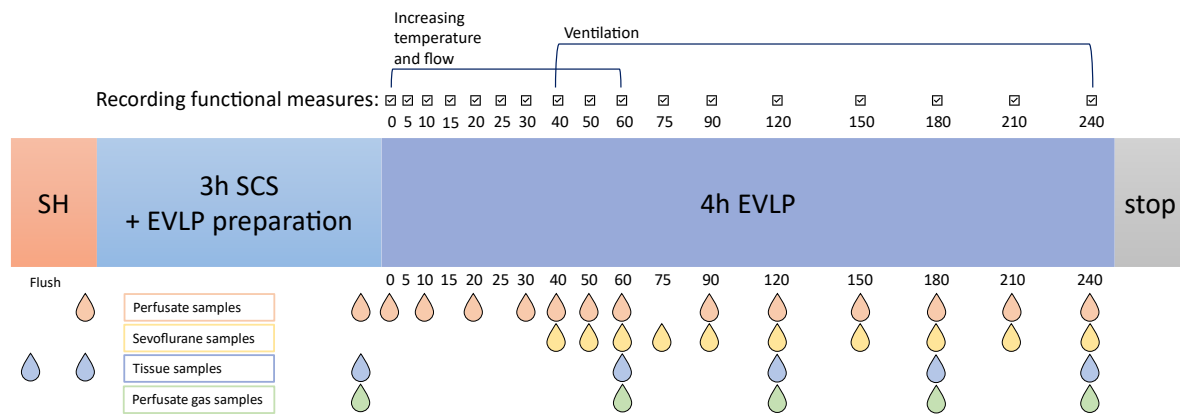

Figure S1 - EVLP sampling timeline. Abbreviations: SH, Slaughterhouse; SCS, static cold storage

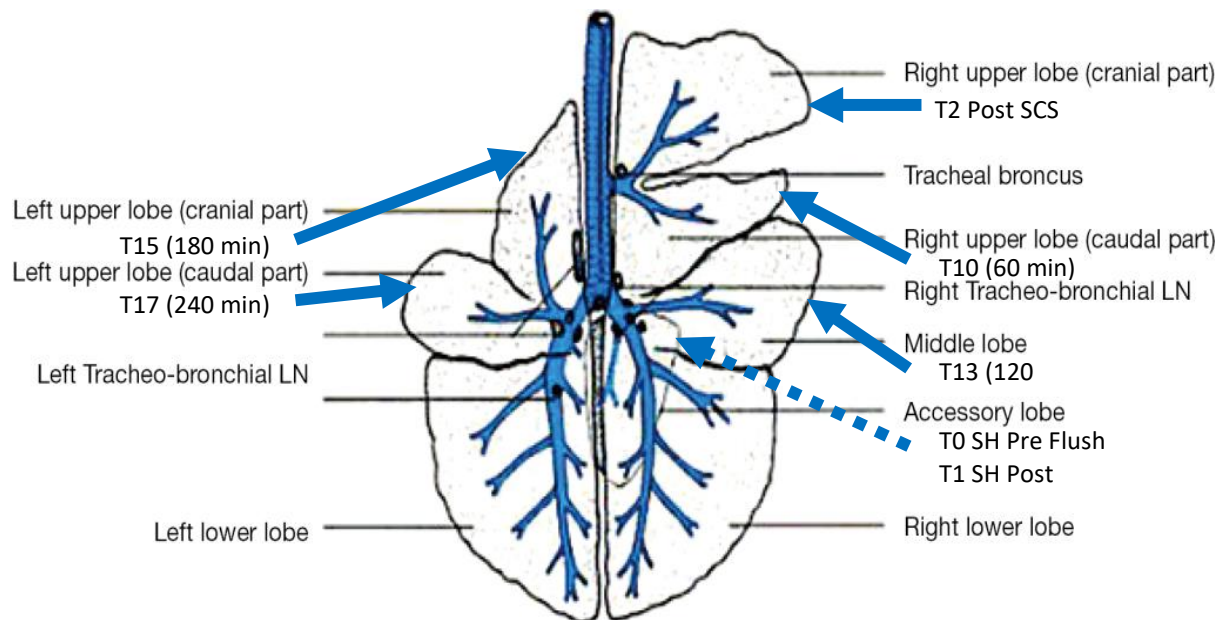

Figure S2 - Biopsy sites.<sup>1</sup> Abbreviations: SCS, static cold storage; min, minutes after start of EVLP; SH, Slaughterhouse

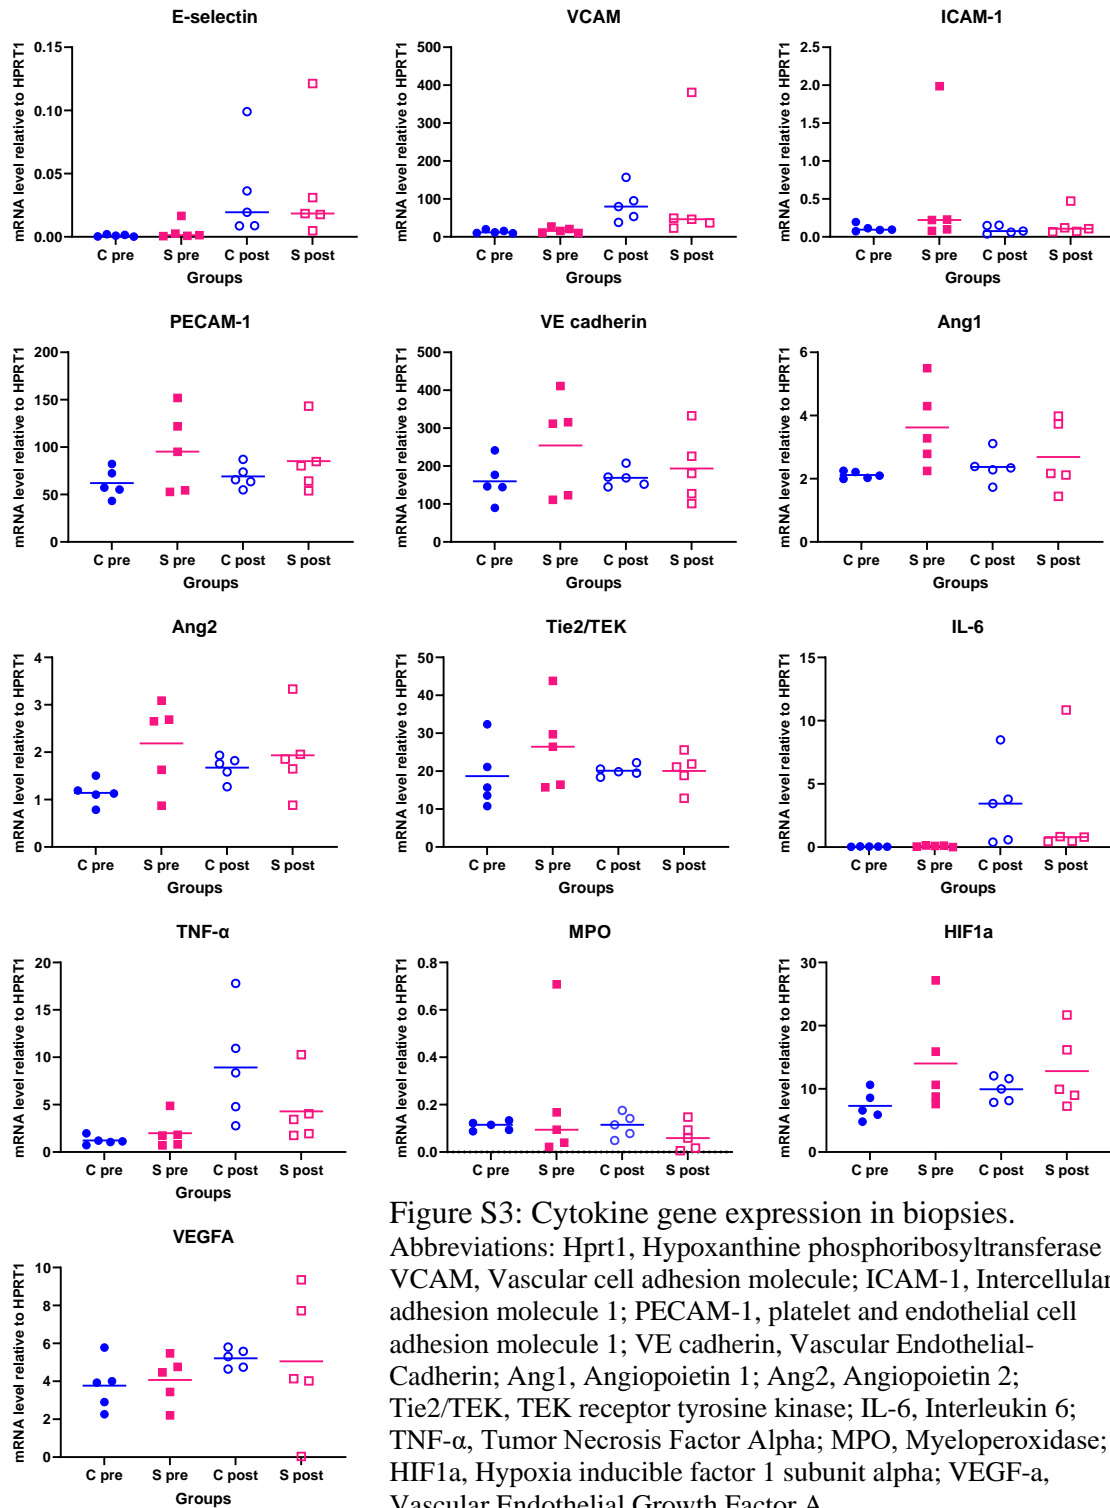

Figure S3: Cytokine gene expression in biopsies. Abbreviations: Hprt1, Hypoxanthine phosphoribosyltransferase 1; VCAM, Vascular cell adhesion molecule; ICAM-1, Intercellular adhesion molecule 1; PECAM-1, platelet and endothelial cell adhesion molecule 1; VE cadherin, Vascular Endothelial-Cadherin; Ang1, Angiopoietin 1; Ang2, Angiopoietin 2; Tie2/TEK, TEK receptor tyrosine kinase; IL-6, Interleukin 6; TNF- $\alpha$ , Tumor Necrosis Factor Alpha; MPO, Myeloperoxidase; HIF1a, Hypoxia inducible factor 1 subunit alpha; VEGF-a, Vascular Endothelial Growth Factor A

## Supplementary Tables

Table S1 - Composition of homemade flush and perfusion solutions

| Ingredient                  | Flush solution | Perfusion solution |
|-----------------------------|----------------|--------------------|
| NaCL (g/L)                  | 8              | 2,16               |
| KCl (g/L)                   | 0,4            | 0,34               |
| MgSO4 (g/L)                 | 0,098          |                    |
| Na2HPO4 (g/L)               | 0,046          |                    |
| KH2PO4 (g/L)                | 0,063          |                    |
| D-glucose monohydrate (g/L) | 1              |                    |
| Dextran 40 (g/L)            | 50             | 5                  |
| Human Albumin (g/L)         |                | 70                 |
| Glucose anhydrous (g/L)     |                | 1,8                |
| NaH2PO4 monobasic (g/L)     |                | 0,146              |
| CaCl2 dihydrate (g/L)       |                | 0,22               |
| MgCl2 (g/L)                 |                | 0,11               |
| NaHCO3 (g/L)                |                | 1,26               |
| NaOH (2M)                   |                | titrate to pH 7,4  |
| <b>Medications</b>          |                |                    |
| Heparin (IU/L)              | 5,000          | 5,000              |
| Dexamethasone (mg/L)        |                | 50                 |
| Cefuroxime (mg/L)           |                | 750                |
| Nitroglycerine (mg/L)       | 4              | 6,5                |
| TRIS Buffer (mmol/L)        | 0,09           |                    |

Table S2 - Sample Timepoints

| Sample | Timepoint           | Sevoflurane | Perfusate | Biopsies  | Blood Gas |
|--------|---------------------|-------------|-----------|-----------|-----------|
| T0     | SH pre Flush        |             |           | x         |           |
| T1     | SH post Flush       |             | x         | x         |           |
| T2     | pre EVLP / post SCS |             |           | x (+mRNA) | x         |
| T3     | Retro Perfusion     |             | x         |           |           |
| T4     | 0 min (start EVLP)  |             | x         |           |           |
| T5     | 10 min              |             | x         |           |           |
| T6     | 20 min              |             | x         |           |           |
| T7     | 30 min              |             | x         |           |           |
| T8     | 40 min              | x           | x         |           |           |
| T9     | 50 min              | x           | x         |           |           |
| T10    | 60 min              | x           | x         | x         | x         |
| T11    | 75 min              | x           |           |           |           |
| T12    | 90 min              | x           | x         |           |           |

|                                                                                                                                   |         |    |    |           |   |
|-----------------------------------------------------------------------------------------------------------------------------------|---------|----|----|-----------|---|
| T13                                                                                                                               | 120 min | x  | x  | x         | x |
| T14                                                                                                                               | 150 min | x  | x  |           |   |
| T15                                                                                                                               | 180 min | x  | x  | x         | x |
| T16                                                                                                                               | 210 min | x  | x  |           |   |
| T17                                                                                                                               | 240 min | x  | x  | x (+mRNA) | x |
| <b>Total (per exp)</b>                                                                                                            |         | 10 | 15 | 7         | 5 |
| Abbreviations: SH, Slaughterhouse; SCS, static cold storage; Retro, retrograde; min, minutes after start of EVLP; exp, experiment |         |    |    |           |   |

Table S3 - Primer/probe sets used for mRNA expression analyses

| Gene          | Assay ID      | Encoded protein                                   |
|---------------|---------------|---------------------------------------------------|
| HPRT1         | Oa04825272_gH | Hypoxanthine phosphoribosyltransferase 1          |
| E-selectin    | Oa04658914_m1 | E-selectin                                        |
| VCAM          | Oa04918369_sH | Vascular cell adhesion molecule                   |
| ICAM-1        | Oa04658649_m1 | Intercellular adhesion molecule 1                 |
| PECAM-1       | Oa04677168_m1 | Platelet and endothelial cell adhesion molecule 1 |
| VE cadherin   | Oa04661728_g1 | Cadherin 5, Vascular endothelial cadherin         |
| Ang1          | Oa04876148_m1 | Angiopoietin 1                                    |
| Ang2          | Oa04857533_m1 | Angiopoietin 2                                    |
| Tie2/TEK      | Oa04724201_m1 | TEK receptor tyrosine kinase, Tie2                |
| IL-6          | Oa04656315_m1 | Interleukin 6                                     |
| TNF- $\alpha$ | Oa04656867_g1 | Tumor Necrosis Factor Alpha                       |
| MPO           | Oa04654413_g1 | Myeloperoxidase                                   |
| HIF1a         | Oa04877335_m1 | Hypoxia inducible factor 1 subunit alpha          |
| VEGFA         | Oa04653812_m1 | Vascular Endothelial Growth Factor A              |

Table S4 - Amount of sevoflurane administered in mL/min

| Timepoint (min) | Sevoflurane administration (mL/h) |
|-----------------|-----------------------------------|
| 40              | 5.0 (4.63/5.38)                   |
| 50              | 4.0 (3.63/5.65)                   |
| 60              | 3.3 (2.63/5.00)                   |
| 75              | 3.4 (2.90/3.73)                   |
| 90              | 2.8 (2.70/3.35)                   |
| 120             | 2.7 (2.45/3.25)                   |
| 150             | 2.6 (2.55/3.30)                   |
| 180             | 2.8 (2.55/2.90)                   |
| 210             | 2.8 (2.35/2.85)                   |
| 240             | 2.8 (2.45/3.00)                   |

Data are presented as median (interquartile range).  
Abbreviations: min, minutes after start of EVLP

## References

1. de la Torre M, Gonzalez-Rivas D, Fernández-Prado R, Delgado M, Fieira EM, Centeno A. Uniportal video-assisted thoracoscopic lobectomy in the animal model. *J Thorac Dis*. 2014;6(Suppl 6):656. doi: 10.3978/j.issn.2072-1439.2014.10.03 [doi].
